# Supplementary material for: A secreted helminth microRNA suppresses gastrointestinal cell differentiation required for innate immunity
Source: Front Immunol. 2025 Mar 27;16:1558132. doi: 10.3389/fimmu.2025.1558132 (PMC11983496; doi:10.3389/fimmu.2025.1558132)
Supplement: Supplementary Table 3 — Details of antibodies used in immunofluorescence experiments. [file Table3.xlsx]

## Sheet: Sheet1
Supplementary Table S3. Details of antibodies used in immunofluorescent experiments.
Species	Target	Host and antibody type	Sourse	Dilution
Ovine	CTNNB1	Rabbit pAb	abcam, ab6302	1/100
	KLF4	Rabbit pAb	abcam, ab129473	1/200
	KI67	Rabbit pAb	abcam, ab15580	1/200
	LGR5	Rabbit pAb	Novus, NLS1236	1/500
	POU2F3	Rabbit pAb	Sigma-­Aldrich, HPA019652	1/200
	RELM beta	Rabbit pAb	ab11429	1/200
Murine	CTNNB1	Rabbit pAb	abcam, ab6302	1/100
	KLF4	Rabbit mAb	abcam, ab215036	1/200
	KI67	Rabbit pAb	abcam, ab15580	1/200
	MUC2	Rabbit pAb	Novus, NBP1-31231	1/200
	RELM beta	Rabbit pAb	ab11429	1/200
pAb: polyclonal antibody
mAb: monoclonal antibody
